# Supplementary material for: Artificial intelligence and the diagnosis of oral cavity cancer and oral potentially malignant disorders from clinical photographs: a narrative review
Source: Front Oral Health. 2025 Mar 10;6:1569567. doi: 10.3389/froh.2025.1569567 (PMC11931071; doi:10.3389/froh.2025.1569567)
Supplement: Supplementary file 1 [file Table1.xlsx]

## Sheet: Sheet1
Author	Title	Publication Year	Image Dataset Size (n)	Ground Truth	Image-Taking Device	Algorith/Model	Type of Task	Training	Validation	Testing	External Validation	Explainability	Uncertainty	Data Availability	Comparisons
Alabdan et al.	Artificial-Intelligence-Based Decision Making for Oral Potentially Malignant Disorder Diagnosis in Internet of Medical Things Environment	2022	131 (87 oral cancer, 44 non-cancer)	ENT labeling	Not specified	Deep CNN (Inception-v3), transfer learning	Binary classification of oral cancer vs non cancer	Divided from dataset	Divided from dataset	Same as validation	None	None	None	Photos available
Alanazi et al.	Intelligent Deep Learning Enabled Oral Squamous Cell Carcinoma Detection and Classification Using Biomedical Images	2022	131 (87 oral cancer, 44 non-cancer)	ENT labeling	Not specified	Deep CNN (NasNet), Gabor filtering to reduce noise in images, deep belief network for classification	Binary classification of oral cancer vs non cancer	Divided from dataset	Divided from dataset	Same as validation	None	None	None	Photos available
Camalan et al.	Convolutional Neural Network-Based Clinical Predictors of Oral Dysplasia: Class Activation Map Analysis of Deep Learning Results	2021	73 images from 54 patients, 2 diff locations	Histopathology for all lesions	Nikon and Canon cameras	Deep CNN (Inception-ResNet-v2), transfer learning	Binary classification of suspicious (dysplasia) vs normal		10-fold cross validation, leave one patient out validation	Training on one location's dataset and testing on the other's, testing at patch level and at patient level	Tested on other location's dataset	CAM heat maps	Suspicion scores	None
Chen et al.	Intelligent deep learning supports biomedical image detection and classification of oral cancer	2024	131 (87 oral cancer, 44 non-cancer)	ENT labeling	Not specified	Coordinate Attention Net vs Swin-Transformer	Binary classification of oral cancer vs non cancer	Divided from dataset	Divided from dataset	Divided from dataset	None	CAM heat maps (not disclosed)	None	Photos available
Figueroa et al.	Interpretable deep learning approach for oral cancer classification using guided attention inference network	2022	3500+ (1000+ supicious, OPML and malignancy, 2500 nonsuspicious)	Oral oncology sepcialist annotation from photos	Special probe	Deep CNN (VGG19), transfer learning	Binary classification suspicious (OPML, malignancy) vs non-suspicious	Divided from dataset	Divided from dataset	Divided from dataset	None	Guided Attention Inference Network (GAIN)	None	None
Flügge et al.	Detection of oral squamous cell carcinoma in clinical photographs using a vision transformer	2023	1406 (703 cancer, 703 normal)	Histopathology for all OSCC, annotations by	SLR cameras	Swin Transformer, transfer learning	Binary classification of OSCC vs normal	Divided from dataset	Divided from dataset	Divided from dataset	None	CAM heat maps	None	None
Fu et al.	A deep learning algorithm for detection of oral cavity squamous cell carcinoma from photographic images: A retrospective study	2020	6176	Histopathology	Various cameras, phone	Deep CNN (DenseNet), transfer learning	Binary classification of OSCC/OPMD vs normal	Divided from dataset	Internal divided from dataset, plus separate external and clinical validation sets	Divided from dataset	external validation with clinical photographs from six representative journals in the field of dentistry and oral surgery, clinical validation with 1941 photographs of OCSCC, other diseases or disorders of oral mucosa (all biopsy-proven photographs and normal controls0	None	None	None	Compared with clinicians
Hsu et al.	Oral mucosal lesions triage via YOLOv7 models	2024	6903	Annotations by OMFS residents/attending	SLR Nikon cameras	Deep CNN (YOLOv7) object detector	Detection of lesions and multi-class classification of lesions into one of 3 grades of referral urgency	Divided from dataset	Divided from dataset	Divided from dataset	None	None	Confidence score as per supplementary material	None
Huang et al.	Optimal deep learning neural network using ISSA for diagnosing the oral cancer	2023	131 (87 oral cancer, 44 non-cancer)	ENT labeling	Not specified	Deep CNN, ISSA	Binary classification of oral cancer vs non cancer	Divided from dataset	Divided from dataset	Same as validation	None	None	None	Photos available
Jubair et al.	A novel lightweight deep convolutional neural network for early detection of oral cancer	2022	716 (236 cancer/dysplasia, 450 benign conditions), all tongue	Histopathology and records	Digital cameras and smartphones	Deep CNN (EfficientNet-B0), transfer learning	Binary classification of oral lesions into benign and malignant or potentially malignant	Divided from dataset	Divided from dataset	Divided from dataset	None	None	None	None
Keser et al.	A deep learning approach to detection of oral cancer lesions from intraoral patient images: A preliminary retrospective study	2024	65 (OSCC only)	Histopathology, polygonal bounding box labeling by oral med expert	Not specificied	Deep CNN (YOLOv5), transfer learning	Detection of OSCC	Divided from dataset	Divided from dataset	Divided from dataset	None	None	None	None
Kouketsu et al.	Detection of oral cancer and oral potentially malignant disorders using artificial intelligence-based image analysis	2024	1043 (638 oral cancer/leukoplakia, 405 benign lesions), all tongue	Histopathology for cancer cases and leukoplakia (all dysplasia(, Annotations by specialist surgeons	Canon camera - standardized	Single Shot Multibox Detector (Deep learning object detector)	Detection of tongue cancer	Divided from dataset	Divided from dataset	Divided from dataset (includes all the benign and leukoplakia photos)	None	None	None	None
Lee et al.	Enhancing deep learning classifcation performance of tongue lesions in imbalanced data: mosaic-based soft labeling with curriculum learning	2024	1,810 (372 cancer, 141 OPMDs, 1,297), all tongue	Histopathology for cancer cases and leukoplakia (all dysplasia(, categorization by specialist surgeons	SLR Nikon camera	Deep CNN (EfcientNetB0), transfer learning, mosaic generation for data augmentation, and mosaic-based soft labeling	Multi-class classification into cancer, OPMD, and noncancerous lesion	Divided from dataset	Divided from dataset	Divided from dataset	None	Grad-CAM	Soft labeling provides probability scores for each class	None
Lin et al.	Automatic detection of oral cancer in smartphone-based images using deep learning for early diagnosis	2021	1448 (760 Normal, 251 Aphthous ulcer, 231 Low-risk OPMD, 141 High-risk OPMD, 65)	Histopathology for cancer cases and some others, annoted by oral medicine specialists	Different smartphones, standardized centering of lesion	Deep CNN (HRNet), transfer learning	Multi-class classification into cancer, high risk OPMD, lower risk OPMD, aphthous ulcer, and normal mucosa	Divided from dataset	Divided from dataset	Same as validation	None	CAM heat maps	Probability scores for each category	Code available
Liyanage et al.	Malignant and non-malignant oral lesions classification and diagnosis with deep neural networks	2023	342 (113 non-neoplastic lesions, 107 benign neoplasms, 122 premalignant/malignant lesions), images from textbooks	Definitive diagnoses from textbooks	Textbook images	Deep CNN (MobileNetV3, EfficientNetV2)	Multi-class classification into non-neoplastic vs benign neoplastic vs premalignant/malignant lesions	Divided from dataset	Divided from dataset	Same as validation	None	None	None	None
Marzouk et al.	Deep Transfer Learning Driven Oral Cancer Detection and Classification Model	2022	131 (87 oral cancer, 44 non-cancer)	ENT labeling	Not specified	Fuzzy-enabled pre-processing, Deep CNN (DenseNet-169) feature extraction, AE-based classification, and COA-based parameter optimization.	Binary classification of oral cancer vs non-cancer	Divided from dataset	Divided from dataset	Same as validation	None	None	None	Photos available
Nanditha et al.	An Ensemble Deep Neural Network Approach for Oral Cancer Screening	2021	332 (63 benign, 269 precancer)	Not specified	Smartphones and cameras	Deep CNN ensemble (Resnet-50 and VGG-16)	Binary classification of benign vs precancer	Divided from dataset	Divided from dataset	Same as validation	None	None	None	None
Parola et al.	Towards explainable oral cancer recognition: Screening on imperfect images via Informed Deep Learning and Case-Based Reasoning	2024	567 (198 aphthous, 170 neoplastic, 199 traumatic)	Bbox, label, and case similarity ranking annotations by clinicians	Smartphones and cameras	Ensemble of 3 deep CNNs for lesion detection and feature extraction, classification and corresponding visual explanation with informed deep learning; integrates human similarity information	Detection and multi-class classification into aphthous, neoplastic, and traumatic lesions	Divided from dataset	Divided from dataset	Separate dataset	None	explanation is expressed as a rank of closeness (similarity) of new case with previous reference cases via "case-based reasoning"	None	Dataset available
Rabinovici-Cohen et al.	From Pixels to Diagnosis: Algorithmic Analysis of Clinical Oral Photos for Early Detection of Oral Squamous Cell Carcinoma diagnosis of oral cavity cancer.	2024	2398 (541 OSCC, 260 mimicking cancer, 1494 benign, 103 normal mucosa)	Histopathology for OSCC and mimicking lesions, reliable textbooks and journals used for part of photo set	Not specified	Deep CNN (ResNet18), deep optimized CNN (ResNet50), ensemble, late fusion of metadata of lesion type and location, transfer learning	Binary classification of OSCC vs mimic/benign/normal and of OSCC/mimic vs benign/normal, at image-level and patient-level, incorporating metadata of lesion type and location, transfer learning from other medical imaging vs standard ImageNet	Divided from dataset	Divided from dataset	Same as validation	None	CAM heat maps	None	None	Compared with clinicians
Shamim et al.	Automated detection of oral pre-cancerous tongue lesions using deep learning for early	2022	300 (all tongue)	Internet images, annotated by experienced clinician *some images in paper are labeled wrong so not very reliable	Internet images	Deep CNNs	Binary classification (benign and precancerous) and Multi-class classification (HT, FT, GT, ST, LP)	Divided from dataset	Divided from dataset	Same as validation	None	None	None	None
Sharma et al.	A Convolutional Neural Network Based Deep Learning Algorithm for Identification of Oral Precancerous and Cancerous Lesion and Differentiation from Normal Mucosa: A Retrospective Study	2022	329 (121 OSCC, 102 OPMD, 106 normal)	Histopathology for OSCC	Mobile phones and cameras	Deep CNNs, transfer learning	Multi-class classification into malignant, premalignant, and normal	Divided from dataset	Divided from dataset	Divided from dataset	None	None	None	None
Song et al.	Classification of imbalanced oral cancer image data from high-risk population	2021	3851 (91 malignant, 1100 premalignant, 243 benign, 2417 normal), all buccal mucosa	Specialist labeling	Special probe	Deep CNN (VGG19), transfer learning, data-level and algorith-level augmentation	Multi-class classification into malignant, premalignant, benign, and normal	Divided from dataset	4-fold cross validation	Same as validation	None	None	None	None
Song et al.	Exploring uncertainty measures in convolutional neural network for semantic segmentation of oral cancer images	2022	492 (396 malignant and premalignant, 96 benign and normal)	Specialist annotation	Special probe	Deep learning segmenter (UNet), Bayesian deep learning for probabilistics	Segmentation of oral malignant and premalignant lesions with uncertainty levels	Divided from dataset	10-fold cross validation	Same as validation	None	Uncertainty maps	Uncertainty estimations	None
Song et al.	Classification of Mobile-Based Oral Cancer Images Using the Vision Transformer and the Swin Transformer	2024	2434 (1243 malignant and OMPL, 1191 benign and normal)	Specialist labeling	Special probe	Vision transformer, Swin transformer, transfer learning	Binary classification into suspicious and nonspicious	Divided from dataset	5-fold cross validation	Same as validation	None	None	None	None
Talwar et al.	AI-Assisted Screening of Oral Potentially Malignant Disorders Using Smartphone-Based Photographic Images	2023	2178 (1120 suspicious ie cancer and OPMD, 1058 non-suspicious ie benign and normal)	Specialist labeling at image-level	Smartphones - training involved	Deep CNNs and transformers	Binary classification into suspicious and nonspicious	Divided from dataset	Divided from dataset	Divided from dataset	Independent dataset from other clinic with 220 suspicious and 220 nonsuspicious	CAM heat maps	None	Code available
Tanriver et al.	Automated Detection and Classification of Oral Lesions Using Deep Learning to Detect Oral Potentially Malignant Disorders	2021	684 (162 carcinoma, 248 OPMD, 274 benign)	Histopathology for some, Internet for others, polygon Bbox and labeling done by experienced oral pathologist	Unspecified + Internet images	U-Net for semantic segmentation, Mask R-CNN for instance segmentation, YOLOv5 for object detection, deep CNNs for classification, transfer learning	Semantic segmentation, instance segmentation, detection, and multi-class classification of carcinoma, OPMD, and benign	Divided from dataset	Divided from dataset	Divided from dataset	None	None	Probability scores/confidence values for segmentation, detection, and classification	None
Ünsal et al.	Deep convolutional neural network algorithm for the automatic segmentation of oral potentially malignant disorders and oral cancers	2023	500 (436 OPMD, 36 cancer)	Histopathology and records, two experts manual segmentation	Not specified	U-Net for segmentation	Semantic segmentation	Divided from dataset	Divided from dataset	Divided from dataset	None	None	None	None
Vinayahalingam et al.	Deep convolutional neural network algorithm for the automatic segmentation of oral potentially malignant disorders and oral cancers	2024	4161 (OSCC, OPMD, lichen planus)	Histopathology not specified, pixel-wise segmentation by multiple experts	Not specified	Mask R-CNN for segmentation and Swin Transformer for classification	Instance segmentation and multi-class classification of OSCC, leukoplakia, lichen planus, and no disorder	Divided from dataset	5-fold cross validation	Divided from dataset	None	None	Confidence scores for classification label	None
Warin et al.	Automatic classification and detection of oral cancer in photographic images using deep learning algorithms	2021	700 (350 OSCC, 350 normal mucosa)	Histopathology for OSCC, boundary annotations by 3 different surgeons and intersection taken	Not specified	Deep CNN (DenseNet121) for classification, Detectron Faster R-CNN for object detection, transfer learning	Detection and binary classification of OSCC vs normal mucosa	Divided from dataset	5-fold cross validation	Divided from dataset	None	CAM heat maps	None	None
Warin et al.	Performance of deep convolutional neural network for classification and detection of oral potentially malignant disorders in photographic images	2022	600 (300 OPMD, 300 norrmal mucosa)	Histopathology for OPMD, boundary annotations by 3 different surgeons and intersection taken	Nikon camera	Deep CNNs (DenseNet121, ResNet-50) for classification, Faster R-CNN and YOLOv4 for object detection, transfer learning	Detection and binary classification of OPMD vs normal mucosa	Divided from dataset	5-fold cross validation	Divided from dataset	Separate dataset to compare AI model with specialists, but dataset from same clinic	None	None	None
Welikala et al.	Automated Detection and Classification of Oral Lesions Using Deep Learning for Early Detection of Oral Cancer	2020	2155 (OSCC, high and low risk OMPD, benign lesions, normal mucosa)	Histopathology not specified, partly used composite annotation by multiple clinicians for Bbox	Not specified, some images from internet	Deep CNN (ResNet-101) for classification, Faster R-CNN for object detection	Binary image classification of lesion vs no lesion, binary classification of referral needed vs no referral needed, multi-class classification of refer cancer/high risk OPMD vs refer low risk OPMD vs refer for other reasons vs no referral needed vs no lesion, object detection, transfer learning	Divided from dataset	Divided from dataset	Divided from dataset	None	None	None	None
Welikala et al.	Clinically Guided Trainable Soft Attention for Early Detection of Oral Cancer	2021	2155 (OSCC, high and low risk OMPD, benign lesions, normal mucosa)	Histopathology not specified, used composite annotation by multiple clinicians for Bbox	Not specified	Deep CNN (VGG) with clinically guided attention, transfer learning	Binary classification of referral outcomes	Divided from dataset	Divided from dataset	Divided from dataset	None	CAM heat maps	None	None
Wuttisarnwattana et al.	Precise Identification of Oral Cancer Lesions Using Artificial Intelligence	2024	2591 (OSCC, OMPD, normal mucosa)	Not specified	Smartphones?	DeepLab v3+ with ResNet-50	Segmentation and multi-class classification into OSCC, OPMD, and normal mucosa	Not specified	Not specified	Not specified	None	None	None	None
Xie et al.	Oral mucosal disease recognition based on dynamic self-attention and feature discriminant loss	2024	813 (360 OLP, 223 oral leukoplakia, 230 oral ulcer)	Histopathology not specified, image-level categorization by specialists	Not specified	Region location network based on dynamic self-attention and a feature discrimination loss function for similar feature classification	Multi-class classification of OLP, oral leukoplakia, and oral ulcer	Divided from dataset	Divided from dataset	Divided from dataset	None	CAM heat maps	None	None
Zhang et al.	Oral cancer diagnosis based on gated recurrent unit networks optimized by an improved version of Northern Goshawk optimization algorithm	2024	131 (87 oral cancer, 44 non-cancer)	ENT labeling	Not specified	Gated recurrent unit optimized by NGO-LC	Binary classification of oral cancer vs non-cancer	Divided from dataset	Divided from dataset	Same as validation	None	None	None	None
Y et al.	Machine Learning in the Detection of Oral Lesions With Clinical Intraoral Images	2023	360 (OSCC, OMPD, and normal mucosa)	Histopathology for all, oral pathologists annotating Bbox and class as well as attributes	Smartphones?	Roboflow machine learning	Detection and binary classification of suspicious (OSCC/OPMD) vs normal mucosa	Divided from dataset	Divided from dataset	Same as validation	None	None	None	None	Compared with clinicians
Ye et al.	Utilizing deep learning for automated detection of oral lesions: A multicenter study	2024	1419 (262 oral lichen planus, 328 oral leukoplakia, 799 OSCC, 30 normal oral mucosa)	Histopathology for all OSCC and oral leukoplakia and some oral lichen planus images, experienced specialists for clinical annotations of remaining cases	Not specified	YOLOX (combining detection and classification)	Detection and multi-class classification into OSCC, oral leukoplakia, oral lichen planus, and normal mucosa	Divided from dataset	Divided from dataset	Divided from dataset	None	None	None	None	Compared with clinicians
